# Supplementary material for: Three is company: dual intramolecular hydrogen-bond enabled carboxylic acid active in ring-opening polymerization
Source: Royal Society of Chemistry journal article supplement (doi:10.1039/c5py01635e), 2015-12-10
Supplement: c5py01635e1.pdf [file c5py01635e1.pdf]

Supporting Information

**Three is company: Dual intramolecular hydrogen-bonding  
enabled carboxylic acid active in ring-opening polymerization**

**Jiaxi Xu, Jingjing Liu, Zhenjiang Li\*, Xiaopei Li, Cheng Chen, Chengxu Zhao,  
Songquan Xu, Xianfu Pan, Jiaqi Liu and Kai Guo\***

\*State Key Laboratory of Materials-Oriented Chemical Engineering, College of Biotechnology  
and Pharmaceutical Engineering, Nanjing Tech University, 30 Puzhu Rd S., Nanjing 211816,  
China. Tel +86 25 5813 9926; Fax +86 25 5813 9935. E-mail: zjli@njtech.edu.cn;  
guok@njtech.edu.cn

**Scheme S1.**  $\gamma$ -Resorcylic acid (**RA**) and congener hydroxybenzoic acids (**SA,1–3**), and combinations of phenol and benzoic acid (**4** and **5**) evaluated as catalysts in the ROP of  $\delta$ -valerolactone. Salicylic acid (**SA**),  $\alpha$ -resorcylic acid (**1**), *m*-salicylic acid (**2**), *p*-salicylic acid (**3**), phenol/ benzoic acid = 1 / 1 (**4**), and phenol/ benzoic acid = 2 / 1 (**5**).

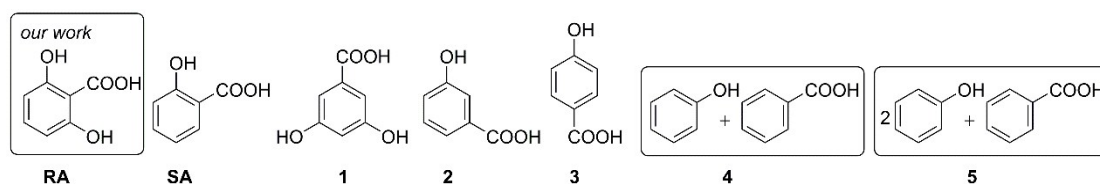

**Table S1.** ROP of  $\delta$ -valerolactone (VL) catalyzed by several catalysts with benzyl alcohol (BnOH) as the initiator<sup>a</sup>

| Entry | M  | Catalyst | [M]/[I] | Time (h) | Conv. <sup>b</sup> (%) | $M_{n,calcd}$ <sup>c</sup> (g mol <sup>-1</sup> ) | $M_{n,NMR}$ <sup>b</sup> (g mol <sup>-1</sup> ) | $M_w/M_n$ <sup>d</sup> |
|-------|----|----------|---------|----------|------------------------|---------------------------------------------------|-------------------------------------------------|------------------------|
| 1     | VL | RA       | 30      | 24       | 98                     | 3040                                              | 3310                                            | 1.08                   |
| 2     | VL | SA       | 30      | 24       | 19                     | 670                                               | 1620                                            | -                      |
| 3     | VL | 1        | 30      | -        | -                      | -                                                 | -                                               | -                      |
| 4     | VL | 2        | 30      | 3 day    | 2                      | -                                                 | -                                               | -                      |
| 5     | VL | 3        | 30      | 3 day    | 1                      | -                                                 | -                                               | -                      |
| 6     | VL | 4        | 30      | 3 day    | 2                      | -                                                 | -                                               | -                      |
| 7     | VL | 5        | 30      | 3 day    | 3                      | -                                                 | -                                               | -                      |

<sup>a</sup>  $[M]_0 = 3.0 \text{ mol L}^{-1}$ ; room temperature. <sup>b</sup> Determined by <sup>1</sup>H NMR in CDCl<sub>3</sub>. <sup>c</sup> Calculated from  $([M]_0/[BnOH]_0) \times \text{conv.} \times (M_w \text{ of } \delta\text{-VL}) + (M_w \text{ of BnOH})$ . <sup>d</sup> Determined by SEC in THF using polystyrene standards.

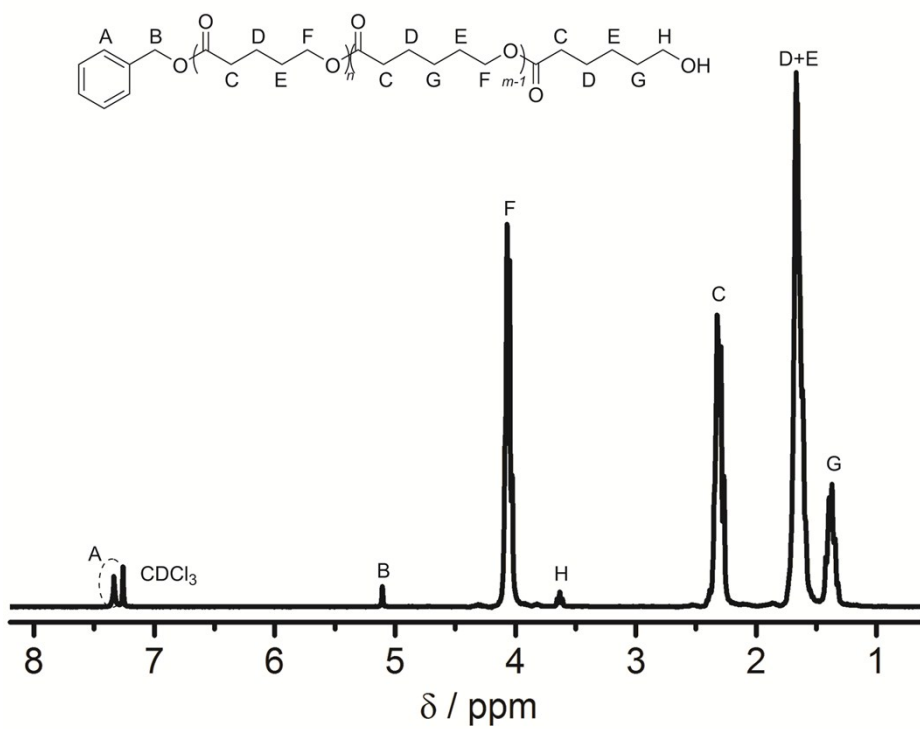

**Figure S1.** <sup>1</sup>H NMR spectrum of the poly(δ-valerolactones)-block-poly(ε-caprolactone).

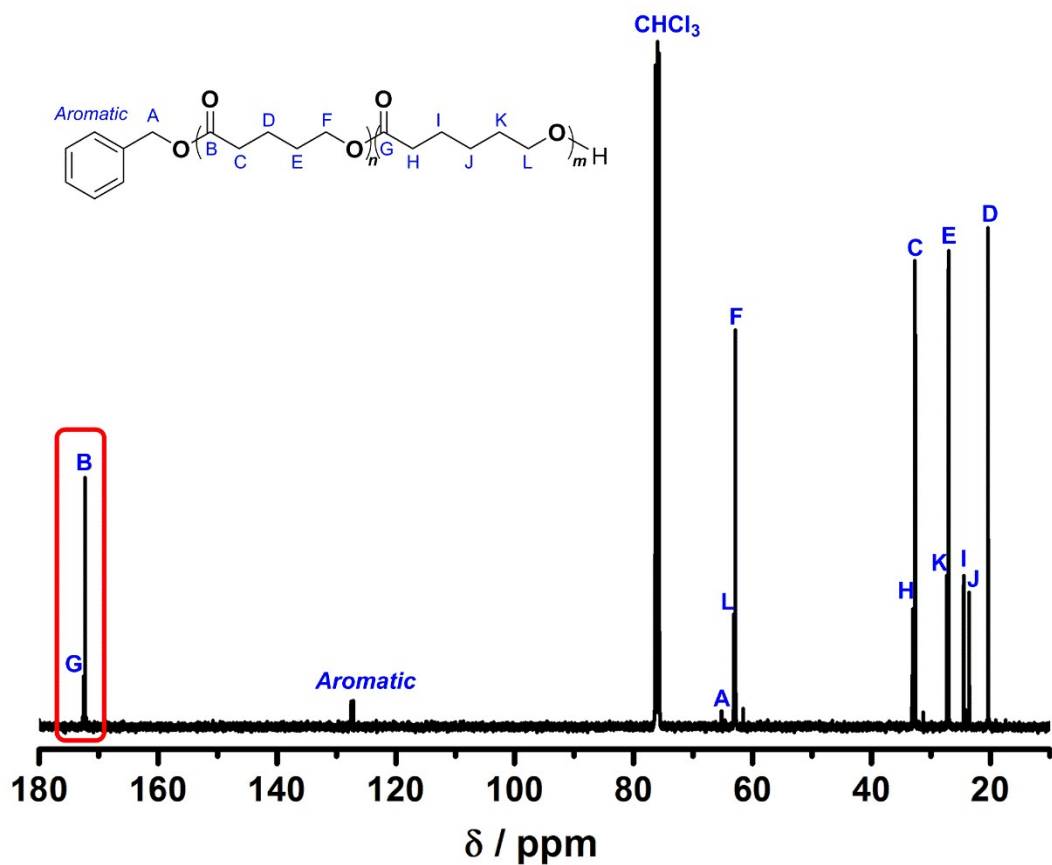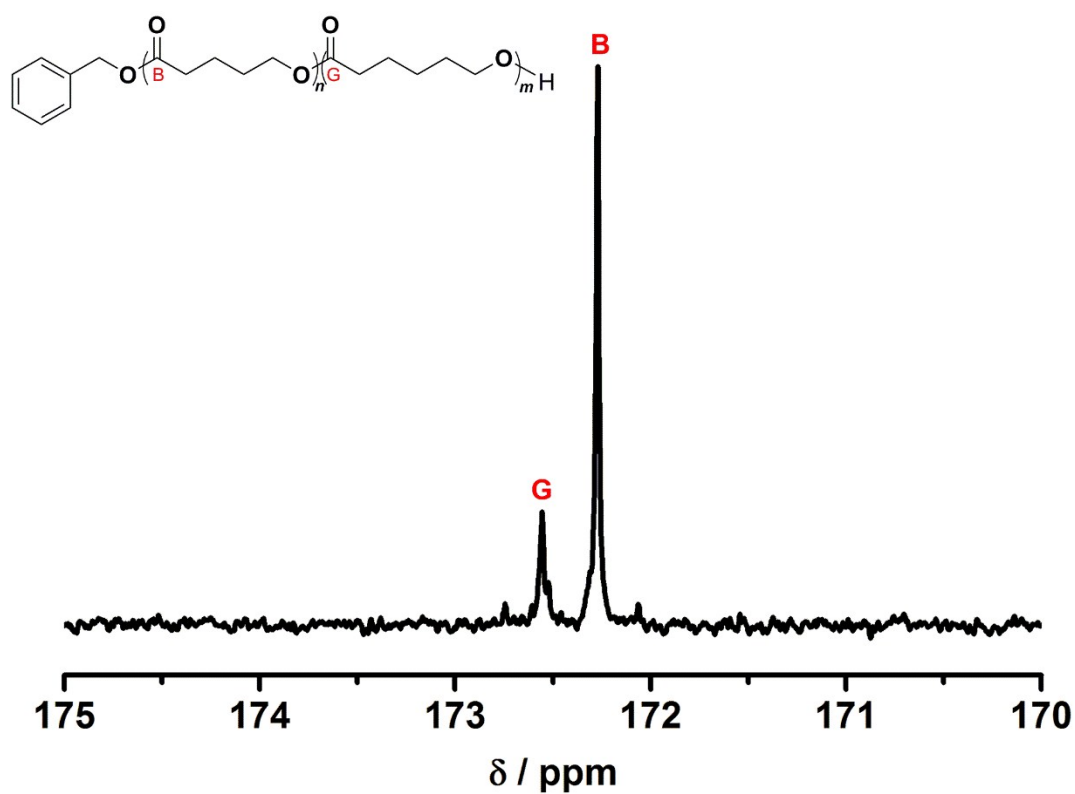

**Figure S2.**  $^{13}\text{C}$  NMR spectrum of the poly( $\delta$ -valerolactones)-block-poly( $\epsilon$ -caprolactone).

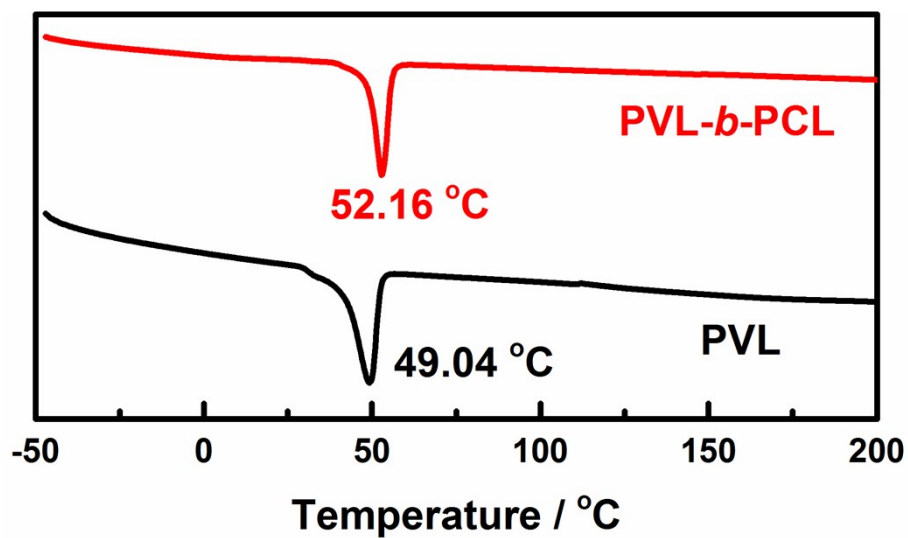

**Figure S3.** DSC traces of poly( $\delta$ -valerolactone) (black) and poly( $\delta$ -valerolactones)-block-poly( $\epsilon$ -caprolactone)(red).

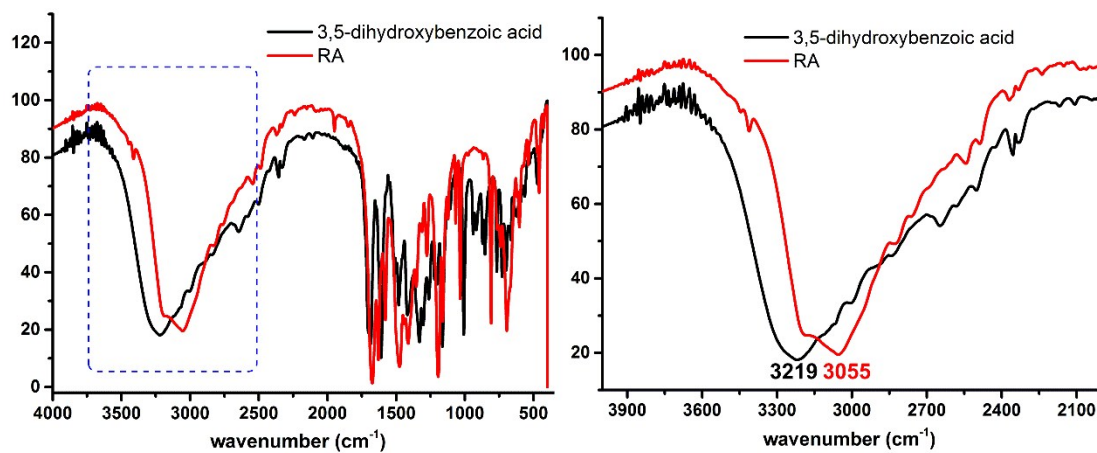

**Figure S4.** IR spectrum of 3,5-dihydroxybenzoic acid and RA by KBr disc.

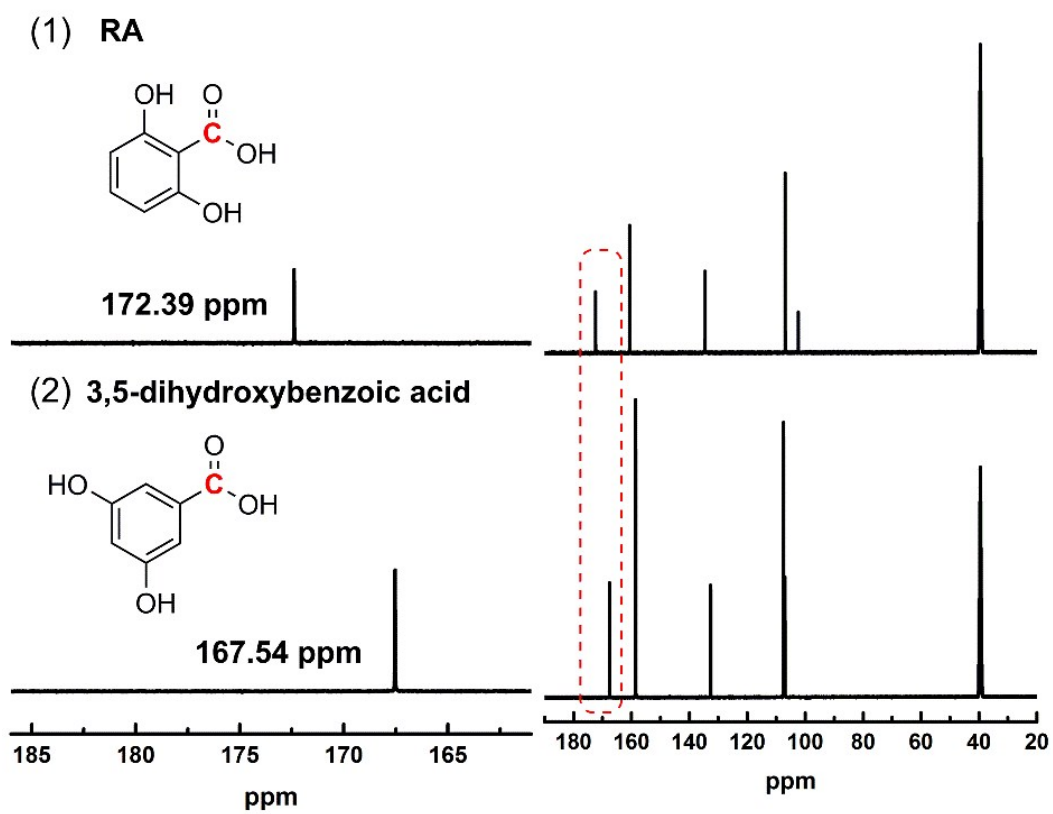

**Figure S5.**  $^{13}\text{C}$  NMR spectrum of 3,5-dihydroxybenzoic acid and RA in  $\text{DMSO-d}_6$ .

## Syntheses of end-functionalized poly( $\delta$ -valerolactone)

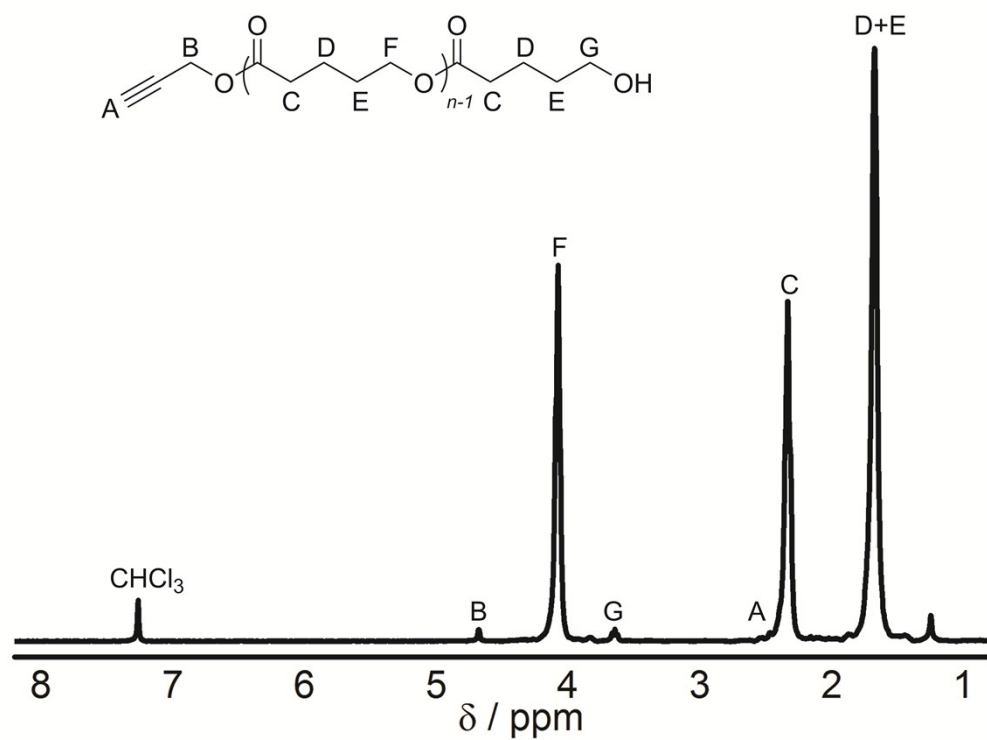

**Figure S6.**  $^1\text{H}$  NMR spectrum of end-functionalized PVL initiated from propargyl alcohol in  $\text{CDCl}_3$

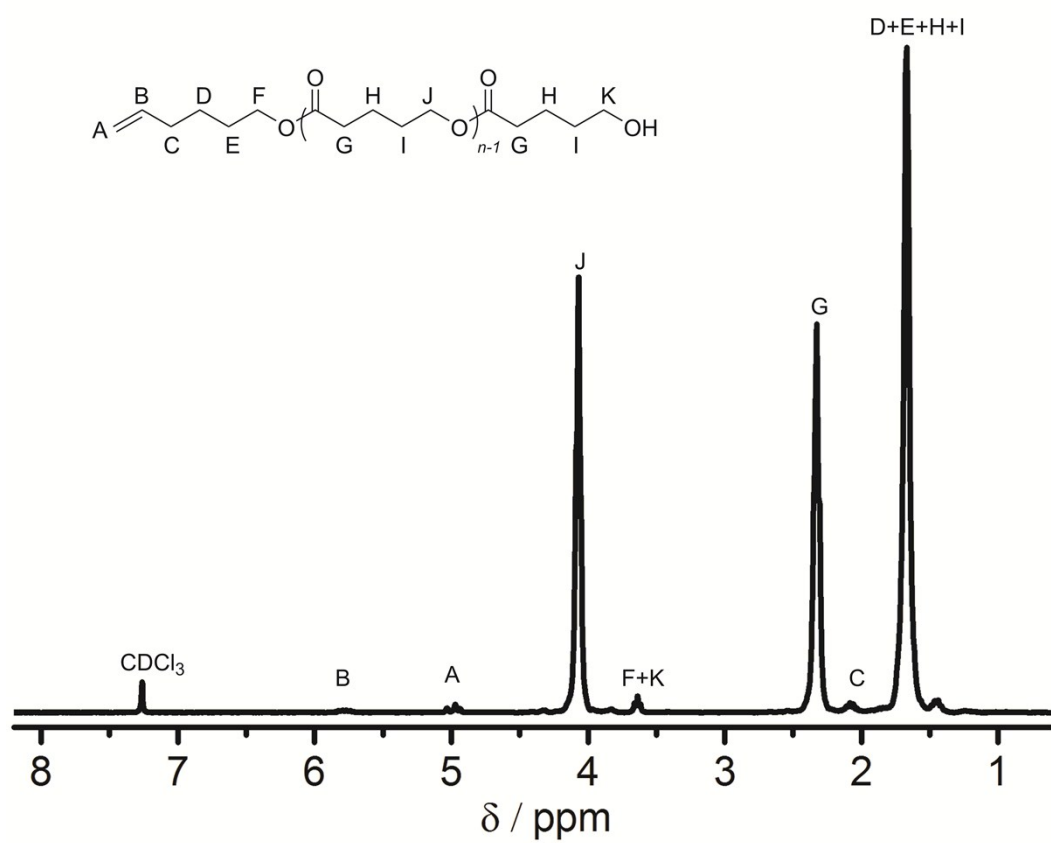

**Figure S7.**  $^1\text{H}$  NMR spectrum of end-functionalized PVL initiated from 5-hexen-1-ol in  $\text{CDCl}_3$



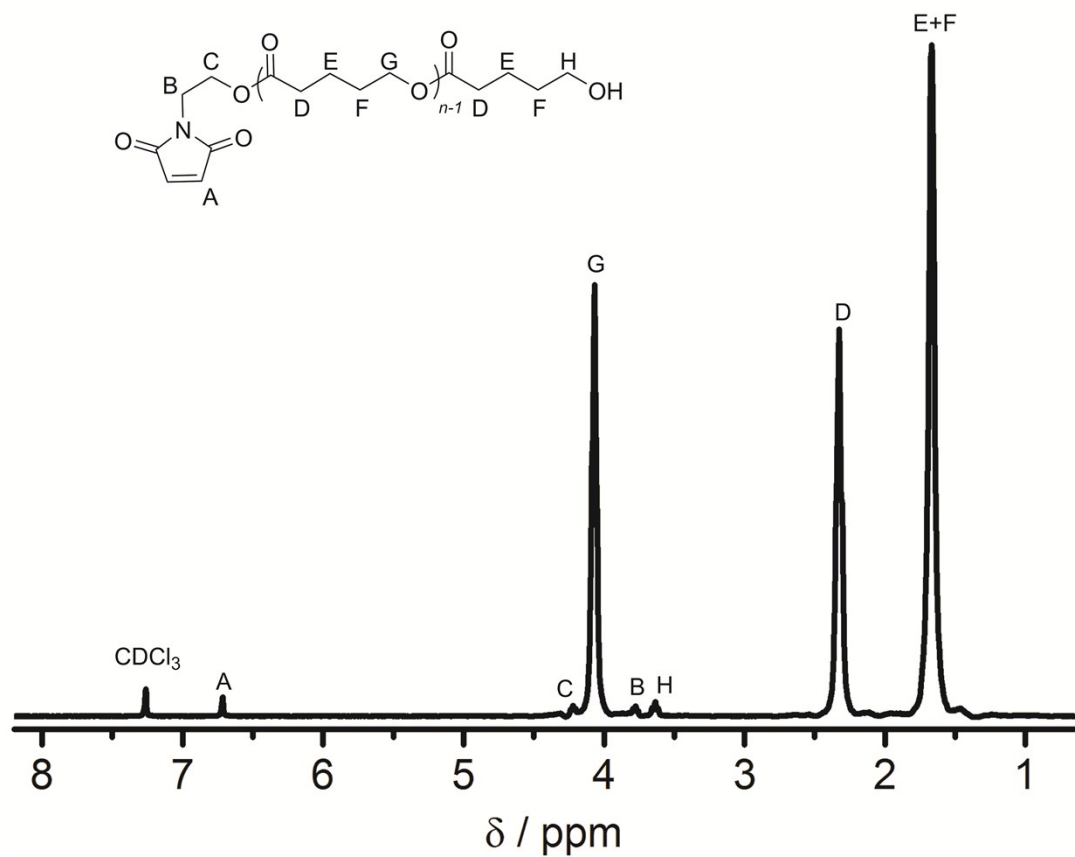

**Figure S8.** <sup>1</sup>H NMR spectrum of end-functionalized PVL initiated from N-(2-hydroxyethyl) maleimide in CDCl<sub>3</sub>

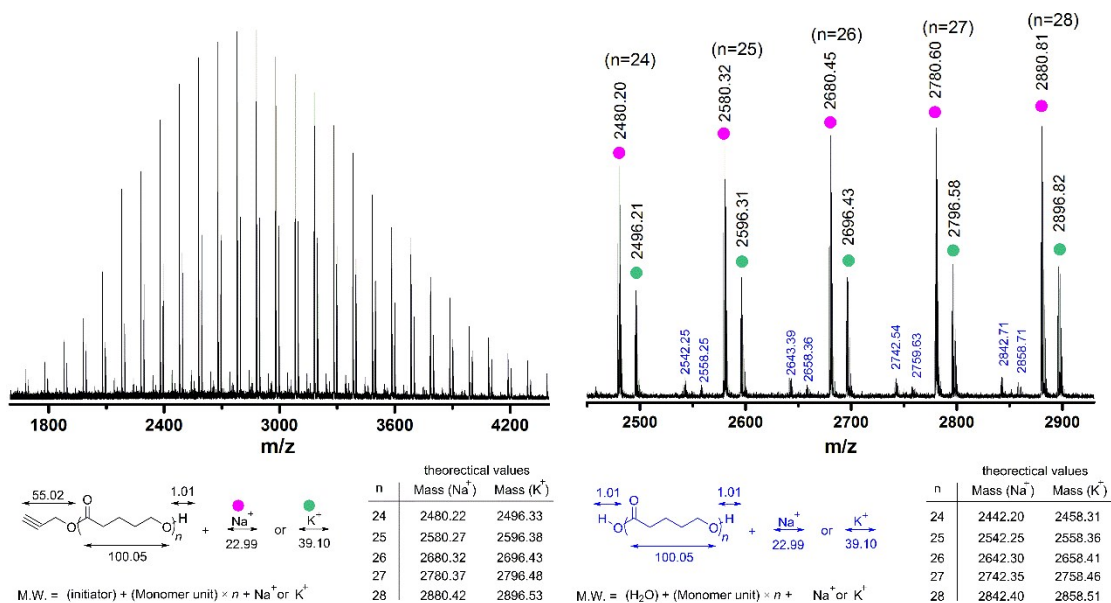

**Figure S9.** MALDI-ToF MS spectrum of the obtained PVL ([VL]<sub>0</sub>/ [propargyl alcohol]<sub>0</sub>/ [RA]<sub>0</sub> = 50/ 1/ 1, CH<sub>2</sub>Cl<sub>2</sub>, rt, [VL]<sub>0</sub> = 1.0 mol L<sup>-1</sup>).

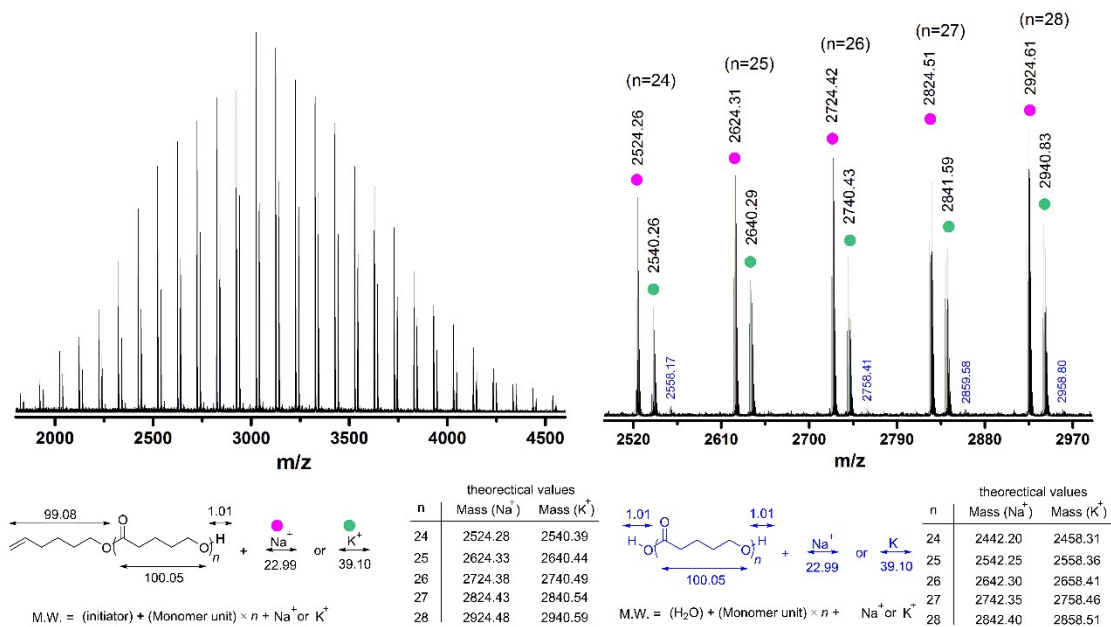

**Figure S10.** MALDI-ToF MS spectrum of the obtained PVL ([VL]<sub>0</sub>/ [5-hexen-1-ol]<sub>0</sub>/ [RA]<sub>0</sub> = 50/ 1/ 1, CH<sub>2</sub>Cl<sub>2</sub>, rt, [VL]<sub>0</sub> = 1.0 mol L<sup>-1</sup>).

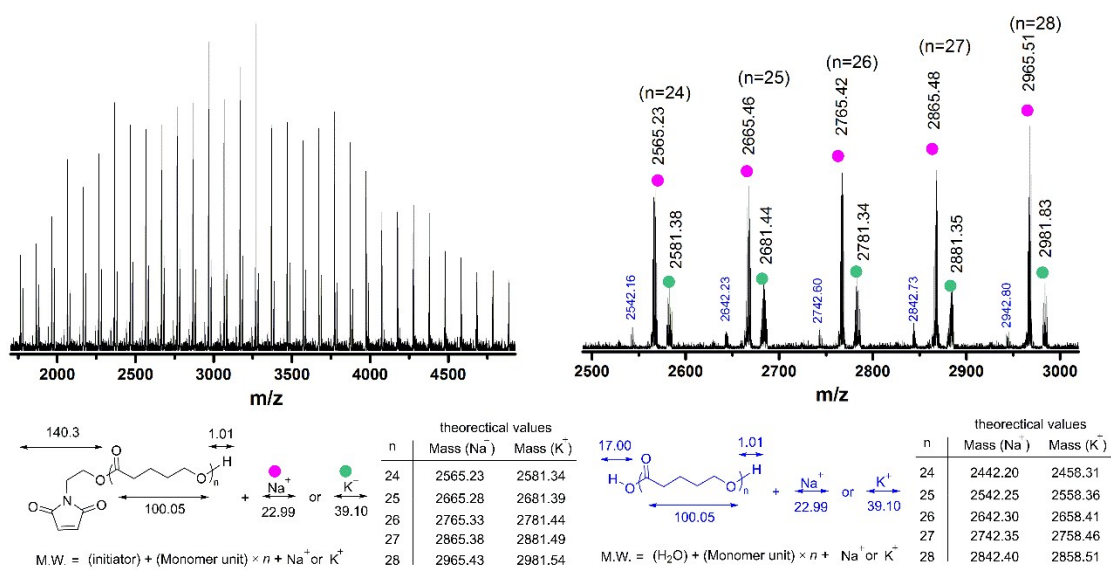

**Figure S11.** MALDI-ToF MS spectrum of the obtained PVL ([VL]<sub>0</sub>/ [N-(2-hydroxyethyl) maleimide]<sub>0</sub> / [RA]<sub>0</sub> = 50/ 1/ 1, CH<sub>2</sub>Cl<sub>2</sub>, rt, [VL]<sub>0</sub> = 1.0 mol L<sup>-1</sup>).
